# Supplementary material for: Characterizing Human Cell Types and Tissue Origin Using the Benford Law
Source: MDPI journal article supplement (doi:10.3390/cells8091004), 2019-08-29
Supplement: s1 [file s1]

## Supplementary material

**Table S1: The GTEx [1] database (v7) used in this study, indicating the number of samples within each tissue.**

| Tissue                                 | Number of Samples | Tissue                               | Number of Samples |
|----------------------------------------|-------------------|--------------------------------------|-------------------|
| Adipose, subcutaneous                  | 442               | Colon, sigmoid                       | 233               |
| Adipose, visceral Omentum              | 355               | Colon, transverse                    | 274               |
| Adrenal gland                          | 190               | Esophagus, gastroesophageal junction | 244               |
| Artery, aorta                          | 299               | Esophagus, mucosa                    | 407               |
| Artery, coronary                       | 173               | Esophagus, muscularis                | 370               |
| Artery, tibial                         | 441               | Fallopian tube                       | 7                 |
| Bladder                                | 11                | Heart, atrial appendage              | 297               |
| Brain, amygdala                        | 100               | Heart, left ventricle                | 303               |
| Brain, anterior cingulate cortex BA24  | 121               | Kidney, cortex                       | 45                |
| Brain, caudate basal ganglia           | 160               | Liver                                | 175               |
| Brain, cerebellar Hemisphere           | 136               | Lung                                 | 427               |
| Brain, cerebellum                      | 173               | Minor salivary gland                 | 97                |
| Brain, cortex                          | 158               | Muscle, skeletal                     | 564               |
| Brain, frontal Cortex BA9              | 129               | Nerve, tibial                        | 414               |
| Brain, hippocampus                     | 123               | Ovary                                | 133               |
| Brain, hypothalamus                    | 121               | Pancreas                             | 248               |
| Brain, nucleus accumbens basal ganglia | 147               | Pituitary                            | 183               |
| Brain, putamen basal ganglia           | 124               | Prostate                             | 152               |
| Brain, spinal cord cervical c1         | 91                | Skin, not sun-exposed, suprapubic    | 387               |
| Brain, substantia nigra                | 88                | Skin, sun-exposed, lower leg         | 473               |
| Breast, mammary tissue                 | 290               | Small intestine, terminal Ileum      | 137               |
| Cells, EBV-transformed lymphocytes     | 130               | Spleen                               | 162               |
| Cells, transformed fibroblasts         | 343               | Stomach                              | 262               |
| Cervix, ectocervix                     | 6                 | Testis                               | 259               |
| Cervix, endocervix                     | 5                 | Thyroid                              | 446               |
| Vagina                                 | 115               | Uterus                               | 111               |

|             |     |  |
|-------------|-----|--|
| Whole blood | 407 |  |
|-------------|-----|--|

|        | Group A       |        |        | Group B       |        |        |
|--------|---------------|--------|--------|---------------|--------|--------|
|        | Cell A        | Cell B | Cell C | Cell A        | Cell B | Cell C |
| Gene 1 | Gene-Centered |        |        | Gene-Centered |        |        |
| Gene 2 | Cell-Centered |        |        | Cell-Centered |        |        |
| Gene 3 | Cell-Centered |        |        | Cell-Centered |        |        |

**Figure S1:** Gene- and cell-centered MAE calculations.

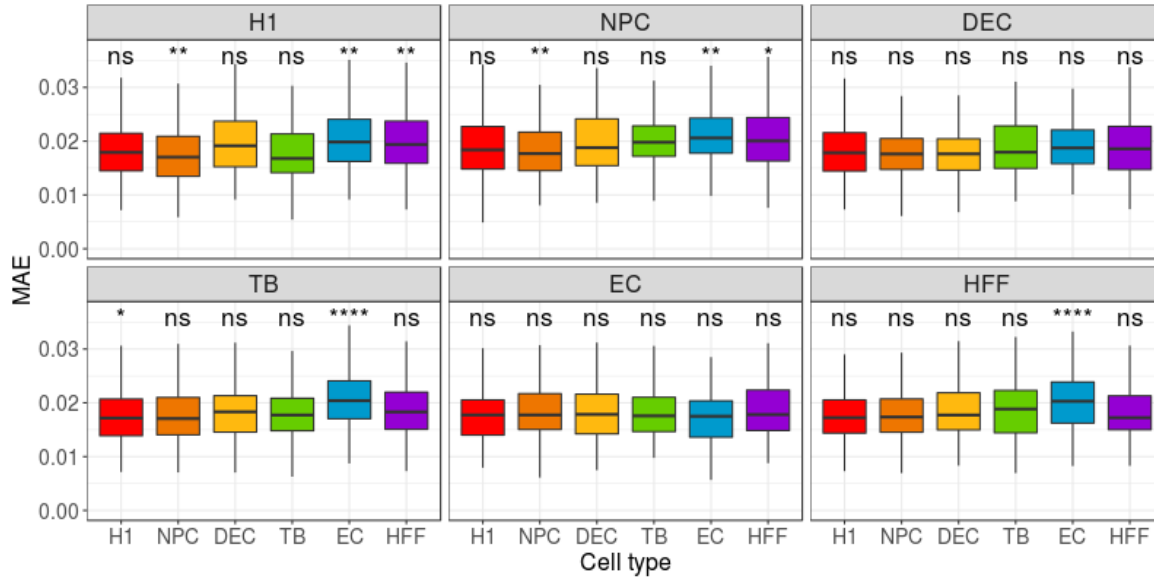

**Figure S2: Distribution of group-based, cell-centered MAE scores calculated across the 200 genes that were found to have the lowest gene-centered MAE scores.** The 200 genes with the lowest MAE scores were detected separately for each cell type, and then cell-centered MAE scores were calculated based on these genes. Panel titles represent the focus group (e.g., the “H1” panel indicates the cell-centered MAE score distribution calculated for each cell type, based on the 200 genes that have the lowest gene-centered MAE scores within the H1 group). H1: human embryonic stem cells (n = 375 cells), NPC: neural progenitor cells (n = 173 cells), DEC: definitive endoderm progenitors (n = 138 cells), EC: endothelial cells (n = 105 cells), TB: trophoblasts (n = 69 cells), HFF: human foreskin fibroblasts (n = 159 cells). Each group was compared with each of the other groups using a Wilcoxon test. Ns: non-significant ( $p > 0.05$ ), \* $p \leq 0.05$ , \*\* $p \leq 0.01$ , \*\*\* $p \leq 0.001$ , \*\*\*\* $p \leq 0.0001$ .

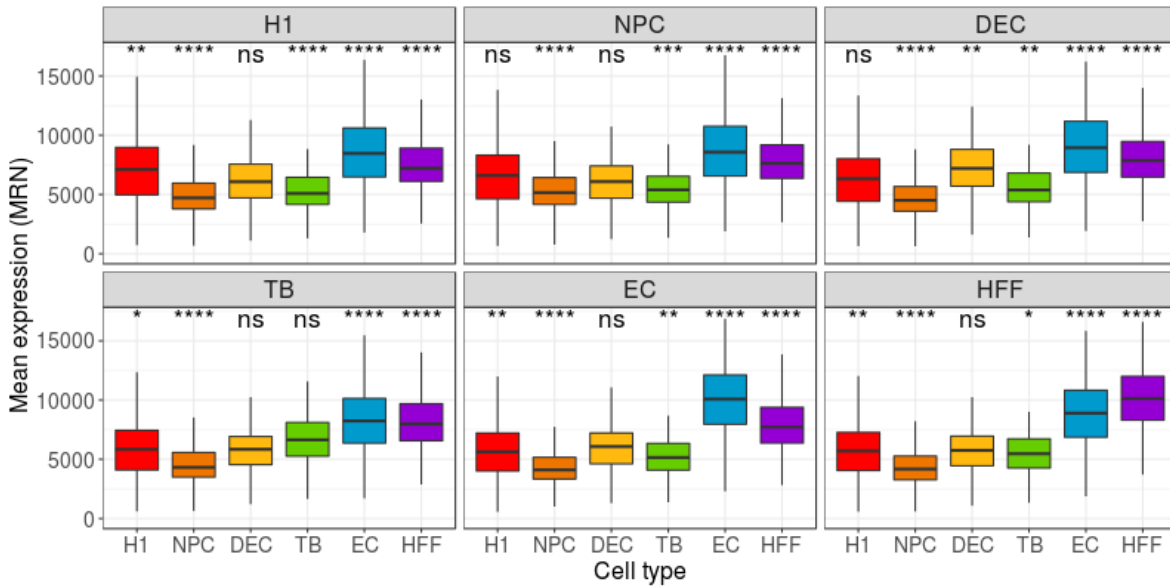

**Figure S3: Distribution of group-based, cell-centered mean-expression (mean-EXP) scores, calculated across the 200 genes that were found to have the highest gene-centered mean-EXP scores.** The 200 genes with the highest mean-EXP scores were detected separately for each cell type, and then cell-centered mean-EXP scores were calculated, based on these genes. Panel titles indicate the focus group. H1: human embryonic stem cells (n = 375 cells), NPC: neural progenitor cells (n = 173 cells), DEC: definitive endoderm progenitors (n = 138 cells), EC: endothelial cells (n = 105 cells), TB: trophoblasts (n = 69 cells), HFF: human foreskin fibroblasts (n = 159 cells). Each group was compared with each of the other groups using a Wilcoxon test. Ns: non-significant ( $p > 0.05$ ),  $*p \leq 0.05$ ,  $**p \leq 0.01$ ,  $***p \leq 0.001$ ,  $****p \leq 0.0001$ .

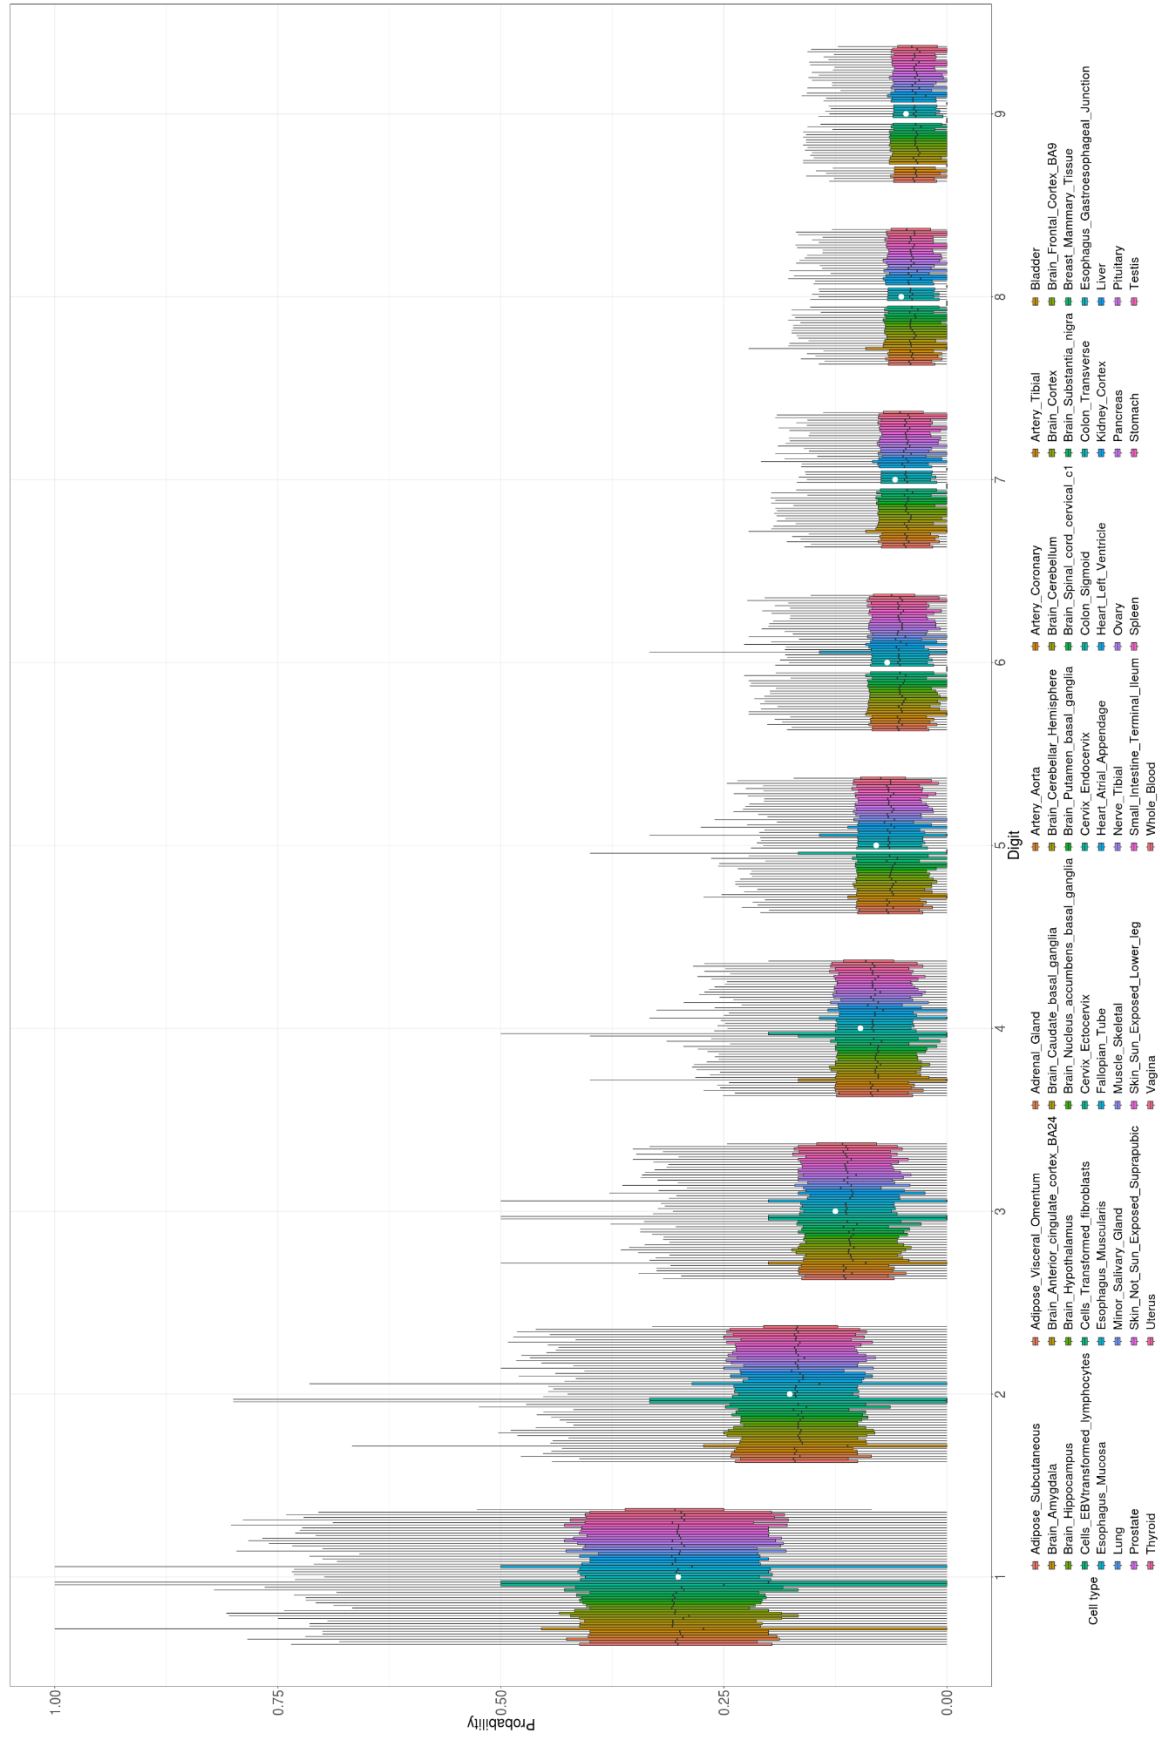

**Figure S4: First-digit distribution of gene-centered expression data for 53 tissues included in the GTEx dataset [1].** White circles represent the Benford first-digit distribution. See **Table S2** for further details.

## **References**

1. GTEx Portal Available online: <https://gtexportal.org/home/>.
